# Supplementary material
Source: PubMed Central journal article supplement (PMC6295227)
Supplement: NIHMS1503902-supplement-1.pdf [file NIHMS1503902-supplement-1.pdf]

| sample ID | L2HGDH           | 14q              | L 2HGDH expression FKPM RNAseq |
|-----------|------------------|------------------|--------------------------------|
| ccRCC-2   | copy neutral LOH | copy neutral LOH | 168.3688342                    |
| ccRCC-9   | copy neutral LOH | copy neutral LOH | 31.91700529                    |
| ccRCC-10  | copy neutral LOH | copy neutral LOH | 48.17566944                    |
| ccRCC-34  | copy neutral LOH | copy neutral LOH | 213.0486723                    |
| ccRCC-64  | copy neutral LOH | copy neutral LOH | 146.7647282                    |
| ccRCC-95  | copy neutral LOH | copy neutral LOH | 58.3799137                     |
| ccRCC-5   | deletion         | deletion         | 148.7274268                    |
| ccRCC-13  | deletion         | deletion         | 81.85910611                    |
| ccRCC-15  | deletion         | deletion         | 82.04240466                    |
| ccRCC-16  | normal           | deletion         | 204.4051974                    |
| ccRCC-19  | deletion         | deletion         | 62.99308892                    |
| ccRCC-20  | deletion         | deletion         | 166.0128535                    |
| ccRCC-21  | deletion         | deletion         | 176.1740252                    |
| ccRCC-22  | deletion         | deletion         | 74.35153921                    |
| ccRCC-23  | deletion         | deletion         | 85.71661375                    |
| ccRCC-26  | deletion         | deletion         | 50.91553472                    |
| ccRCC-29  | deletion         | deletion         | 173.6999815                    |
| ccRCC-36  | deletion         | deletion         | 96.72001674                    |
| ccRCC-40  | deletion         | deletion         | 327.3304086                    |
| ccRCC-44  | deletion         | deletion         | 70.34469317                    |
| ccRCC-45  | deletion         | deletion         | 56.62391834                    |
| ccRCC-46  | normal           | deletion         | 232.3601902                    |
| ccRCC-49  | deletion         | deletion         | 154.8770964                    |
| ccRCC-50  | deletion         | deletion         | 62.65848702                    |
| ccRCC-55  | deletion         | deletion         | 39.54624079                    |
| ccRCC-56  | deletion         | deletion         | 119.5190622                    |
| ccRCC-58  | deletion         | deletion         | 246.3293077                    |
| ccRCC-59  | normal           | deletion         | 271.6980357                    |
| ccRCC-61  | normal           | deletion         | 356.9510253                    |
| ccRCC-65  | deletion         | deletion         | 53.98422583                    |
| ccRCC-66  | deletion         | deletion         | 98.55864318                    |
| ccRCC-68  | deletion         | deletion         | 233.1035628                    |
| ccRCC-69  | deletion         | deletion         | 105.2763981                    |
| ccRCC-71  | deletion         | deletion         | 153.0698281                    |
| ccRCC-75  | deletion         | deletion         | 102.858171                     |
| ccRCC-77  | deletion         | deletion         | 241.8021903                    |
| ccRCC-80  | deletion         | deletion         | 92.78797819                    |
| ccRCC-84  | deletion         | deletion         | 140.4894701                    |
| ccRCC-89  | deletion         | deletion         | 271.3495856                    |
| ccRCC-97  | deletion         | deletion         | 131.5092779                    |
| ccRCC-102 | deletion         | deletion         | 149.4412299                    |
| ccRCC-106 | deletion         | deletion         | 91.97998289                    |
| ccRCC-3   | gain             | gain             | 196.9708297                    |
| ccRCC-14  | gain             | gain             | 113.9777616                    |
| ccRCC-24  | gain             | gain             | 204.7289582                    |
| ccRCC-38  | gain             | gain             | 255.4217086                    |
| ccRCC-41  | gain             | gain             | 348.9713922                    |
| ccRCC-52  | gain             | gain             | 223.1853834                    |
| ccRCC-86  | gain             | gain             | 235.4699609                    |
| ccRCC-87  | gain             | gain             | 271.1566543                    |
| ccRCC-96  | gain             | gain             | 409.1016775                    |
| ccRCC-1   | normal           | normal           | 81.7142402                     |
| ccRCC-4   | normal           | normal           | 226.6968533                    |
| ccRCC-6   | normal           | normal           | 290.9098317                    |
| ccRCC-7   | normal           | normal           | 342.4328677                    |
| ccRCC-8   | normal           | normal           | 222.6749313                    |
| ccRCC-11  | normal           | normal           | 242.4988485                    |
| ccRCC-12  | normal           | normal           | 227.0146132                    |
| ccRCC-17  | normal           | normal           | 330.1862259                    |
| ccRCC-18  | normal           | normal           | 423.0122584                    |
| ccRCC-25  | normal           | normal           | 404.9168027                    |
| ccRCC-27  | normal           | normal           | 253.6694675                    |

|           |        |        |             |
|-----------|--------|--------|-------------|
| ccRCC-28  | normal | normal | 189.469066  |
| ccRCC-30  | normal | normal | 57.04529068 |
| ccRCC-31  | normal | normal | 185.055537  |
| ccRCC-32  | normal | normal | 253.6859375 |
| ccRCC-35  | normal | normal | 223.5197739 |
| ccRCC-37  | normal | normal | 629.8002854 |
| ccRCC-39  | normal | normal | 128.6775393 |
| ccRCC-42  | normal | normal | 250.1024737 |
| ccRCC-43  | normal | normal | 214.2669119 |
| ccRCC-48  | normal | normal | 333.6412833 |
| ccRCC-51  | normal | normal | 193.3229398 |
| ccRCC-53  | normal | normal | 268.2464502 |
| ccRCC-54  | normal | normal | 429.340918  |
| ccRCC-60  | normal | normal | 333.8324327 |
| ccRCC-62  | normal | normal | 369.5303534 |
| ccRCC-67  | normal | normal | 139.6357088 |
| ccRCC-70  | normal | normal | 43.81021733 |
| ccRCC-72  | normal | normal | 289.8030448 |
| ccRCC-73  | normal | normal | 315.7104612 |
| ccRCC-76  | normal | normal | 245.9397233 |
| ccRCC-78  | normal | normal | 369.9863343 |
| ccRCC-79  | normal | normal | 278.4600701 |
| ccRCC-81  | normal | normal | 290.8074521 |
| ccRCC-82  | normal | normal | 249.9149596 |
| ccRCC-83  | normal | normal | 255.7815704 |
| ccRCC-85  | normal | normal | 176.7262502 |
| ccRCC-88  | normal | normal | 295.4087103 |
| ccRCC-90  | normal | normal | 171.950583  |
| ccRCC-91  | normal | normal | 318.9097433 |
| ccRCC-92  | normal | normal | 272.5638282 |
| ccRCC-93  | normal | normal | 304.624561  |
| ccRCC-94  | normal | normal | 176.3836663 |
| ccRCC-98  | normal | normal | 294.4830711 |
| ccRCC-99  | normal | normal | 139.1217623 |
| ccRCC-100 | normal | normal | 315.9989489 |
| ccRCC-103 | normal | normal | 235.7769188 |
| ccRCC-104 | normal | normal | 265.0948801 |
| ccRCC-105 | normal | normal | 458.1792869 |
